# Supplementary material for: Safety and Outcome of High-Flow Nasal Oxygen Therapy Outside ICU Setting in Hypoxemic Patients With COVID-19*
Source: PubMed Central journal article supplement (PMC10715700; doi:10.1097/ccm.0000000000006068), 2023-10-19
Supplement: ccm-52-31-s001.pdf [file ccm-52-31-s001.pdf]

## Online Supplement

### Table of Contents

|                                  |    |
|----------------------------------|----|
| STROBE Statement .....           | 2  |
| Figure S1 .....                  | 5  |
| Propensity matching method ..... | 6  |
| Table S1 .....                   | 6  |
| Table S2 .....                   | 7  |
| Table S3 .....                   | 9  |
| Table S4 .....                   | 11 |
| Table S5 .....                   | 13 |
| Table S6 .....                   | 16 |
| Table S7 .....                   | 19 |
| Table S8 .....                   | 21 |
| Table S9 .....                   | 24 |
| Table S10 .....                  | 27 |
| Table S11 .....                  | 29 |
| References .....                 | 30 |

STROBE Statement—Checklist of items that should be included in reports of *cohort studies*

|                              | Item No | Recommendation                                                                                                                                                                       | Page No                 |
|------------------------------|---------|--------------------------------------------------------------------------------------------------------------------------------------------------------------------------------------|-------------------------|
| <b>Title and abstract</b>    | 1       | (a) Indicate the study's design with a commonly used term in the title or the abstract                                                                                               | 4                       |
|                              |         | (b) Provide in the abstract an informative and balanced summary of what was done and what was found                                                                                  | 4                       |
| <b>Introduction</b>          |         |                                                                                                                                                                                      |                         |
| Background/rationale         | 2       | Explain the scientific background and rationale for the investigation being reported                                                                                                 | 6                       |
| Objectives                   | 3       | State specific objectives, including any prespecified hypotheses                                                                                                                     | 6-7                     |
| <b>Methods</b>               |         |                                                                                                                                                                                      |                         |
| Study design                 | 4       | Present key elements of study design early in the paper                                                                                                                              | 7-8                     |
| Setting                      | 5       | Describe the setting, locations, and relevant dates, including periods of recruitment, exposure, follow-up, and data collection                                                      | 7-8                     |
| Participants                 | 6       | (a) Give the eligibility criteria, and the sources and methods of selection of participants. Describe methods of follow-up                                                           | 7-8                     |
|                              |         | (b) For matched studies, give matching criteria and number of exposed and unexposed                                                                                                  | 9 and supplements       |
| Variables                    | 7       | Clearly define all outcomes, exposures, predictors, potential confounders, and effect modifiers. Give diagnostic criteria, if applicable                                             | 7, table 1, supplements |
| Data sources/<br>measurement | 8*      | For each variable of interest, give sources of data and details of methods of assessment (measurement). Describe comparability of assessment methods if there is more than one group | 7,8 and data dictionary |
| Bias                         | 9       | Describe any efforts to address potential sources of bias                                                                                                                            | 7-9                     |

|                        |     |                                                                                                                                                                                                   |                                   |
|------------------------|-----|---------------------------------------------------------------------------------------------------------------------------------------------------------------------------------------------------|-----------------------------------|
| Study size             | 10  | Explain how the study size was arrived at                                                                                                                                                         | 9                                 |
| Quantitative variables | 11  | Explain how quantitative variables were handled in the analyses. If applicable, describe which groupings were chosen and why                                                                      | 8,9                               |
| Statistical methods    | 12  | (a) Describe all statistical methods, including those used to control for confounding                                                                                                             | 8,9                               |
|                        |     | (b) Describe any methods used to examine subgroups and interactions                                                                                                                               | 8,9                               |
|                        |     | (c) Explain how missing data were addressed                                                                                                                                                       | 9                                 |
|                        |     | (d) If applicable, explain how loss to follow-up was addressed                                                                                                                                    | NA                                |
|                        |     | (e) Describe any sensitivity analyses                                                                                                                                                             | 8,9                               |
| <b>Results</b>         |     |                                                                                                                                                                                                   |                                   |
| Participants           | 13* | (a) Report numbers of individuals at each stage of study—eg numbers potentially eligible, examined for eligibility, confirmed eligible, included in the study, completing follow-up, and analysed | 10, Fig 1.                        |
|                        |     | (b) Give reasons for non-participation at each stage                                                                                                                                              | NA                                |
|                        |     | (c) Consider use of a flow diagram                                                                                                                                                                | Fig.1                             |
| Descriptive data       | 14* | (a) Give characteristics of study participants (eg demographic, clinical, social) and information on exposures and potential confounders                                                          | 10-12, table 2-4, and supplements |
|                        |     | (b) Indicate number of participants with missing data for each variable of interest                                                                                                               | Table S3                          |
|                        |     | (c) Summarise follow-up time (eg, average and total amount)                                                                                                                                       | 10                                |
| Outcome data           | 15* | Report numbers of outcome events or summary measures over time                                                                                                                                    | 10-12, table 2-4, and supplements |

|                          |    |                                                                                                                                                                                                              |                                   |
|--------------------------|----|--------------------------------------------------------------------------------------------------------------------------------------------------------------------------------------------------------------|-----------------------------------|
| Main results             | 16 | (a) Give unadjusted estimates and, if applicable, confounder-adjusted estimates and their precision (eg, 95% confidence interval). Make clear which confounders were adjusted for and why they were included | 10-12, table 2-4, and supplements |
|                          |    | (b) Report category boundaries when continuous variables were categorized                                                                                                                                    | NA                                |
|                          |    | (c) If relevant, consider translating estimates of relative risk into absolute risk for a meaningful time period                                                                                             | NA                                |
| Other analyses           | 17 | Report other analyses done—eg analyses of subgroups and interactions, and sensitivity analyses                                                                                                               | 10-12, table 2-4, and supplements |
| <b>Discussion</b>        |    |                                                                                                                                                                                                              |                                   |
| Key results              | 18 | Summarise key results with reference to study objectives                                                                                                                                                     | 14                                |
| Limitations              | 19 | Discuss limitations of the study, taking into account sources of potential bias or imprecision. Discuss both direction and magnitude of any potential bias                                                   | 16-17                             |
| Interpretation           | 20 | Give a cautious overall interpretation of results considering objectives, limitations, multiplicity of analyses, results from similar studies, and other relevant evidence                                   | 14-17                             |
| Generalisability         | 21 | Discuss the generalisability (external validity) of the study results                                                                                                                                        | 14-17                             |
| <b>Other information</b> |    |                                                                                                                                                                                                              |                                   |
| Funding                  | 22 | Give the source of funding and the role of the funders for the present study and, if applicable, for the original study on which the present article is based                                                | 2                                 |

\*Give information separately for exposed and unexposed groups. NA: Not Applicable.

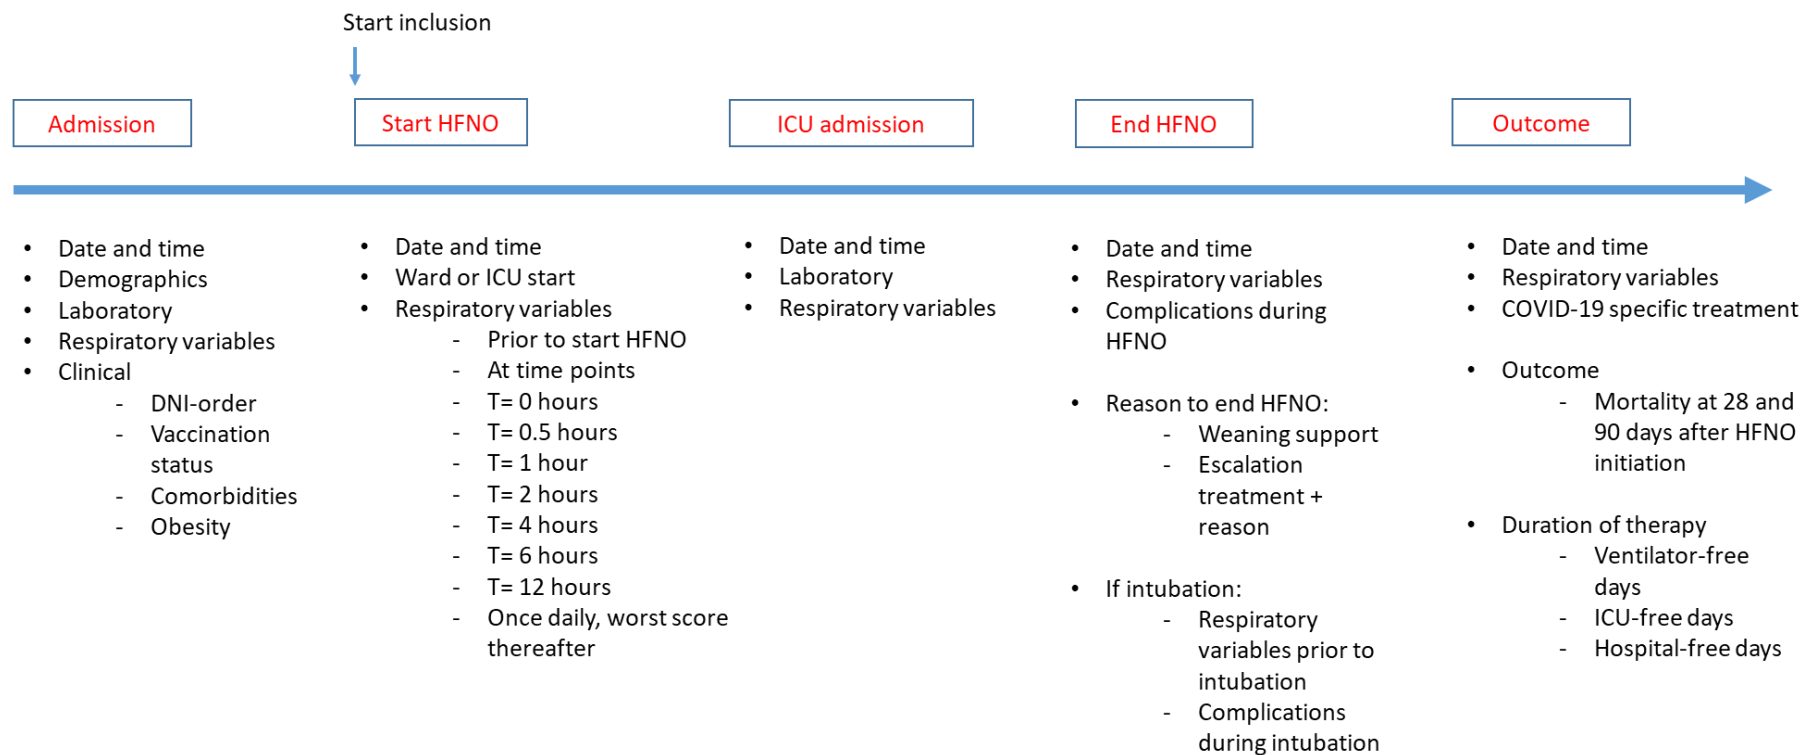

Figure S1: Overview of data collection during study period. Respiratory variables include: FiO<sub>2</sub>, SpO<sub>2</sub>, SpO<sub>2</sub>/FiO<sub>2</sub> ratio, respiratory rate, ROX-index, flow and type of support. Obesity was defined as Body Mass Index (BMI) ≥30.

## Propensity matching method

The propensity score to start HFNO therapy in ICU was calculated for each patient, based on relevant confounders with a clear association to outcome in COVID-19 patients (listed in table M1 below).

| <b>Table S1. Variables used for propensity matching.</b>        |
|-----------------------------------------------------------------|
| Age (1)                                                         |
| Sex (2, 3)                                                      |
| Body Mass Index (BMI) (4, 5)                                    |
| Number of comorbidities (from Charlson comorbidity index)(1, 6) |
| CRP at HFNO start (1, 6)                                        |
| Urea at HFNO start (1, 6)                                       |
| Leukocyte count at HFNO start (7, 8)                            |
| Lymphocyte count at HFNO start (1, 6)                           |
| Thrombocytopenia at HFNO start (9)                              |
| Duration of illness at HFNO start (days) (10, 11)               |
| Respiratory rate prior to start HFNO (1, 9)                     |
| FiO <sub>2</sub> prior to start HFNO (2, 12, 13)                |
| SpO <sub>2</sub> prior to start HFNO (12)                       |

Table S2. Overview of local HFNO practice outside ICU during the study period.

| Centre       | Patients without DNI order | Ward starters | HFNO start on ward in patients without DNI order | HFNO start on ICU, continued on ward | Flow limit on <60 L/min | Flow start HFNO L/min | Flow at phasing out HFNO L/min | Cont. monitoring respiratory rate and SpO <sub>2</sub> | Cont. monitoring blood-pressure or telemetry | Standard frequency of vital parameter control in HFNO patients                | Use of the ROX index | Standard ICU consultation at HFNO start |
|--------------|----------------------------|---------------|--------------------------------------------------|--------------------------------------|-------------------------|-----------------------|--------------------------------|--------------------------------------------------------|----------------------------------------------|-------------------------------------------------------------------------------|----------------------|-----------------------------------------|
| 1            | 249 (41.0%)                | 229 (60.4%)   | Yes                                              | Yes                                  | Yes (40L)               | 40                    | 40                             | Yes                                                    | No                                           | First 24 hours HFNO: at 0.5, 1, 2, 4, 6, 12 and 24 hours. Then 3 times daily. | Yes                  | No                                      |
| 2            | 53 (8.7%)                  | 43 (11.3%)    | Yes                                              | Yes                                  | No                      | 60                    | 30                             | Yes                                                    | Yes                                          | First 4 hours: every hour, then 3 times daily.                                | Yes                  | No                                      |
| 3            | 47 (7.7%)                  | 7 (1.8%)*     | No                                               | Yes                                  | No                      | 50                    | NA                             | Yes                                                    | No                                           | First 24 hours: every 2 hours, then 3 times daily                             | No                   | NA                                      |
| 4            | 11 (1.8%)                  | 11 (2.9%)     | Yes                                              | Yes                                  | No                      | 40                    | <40                            | Yes                                                    | Yes                                          | 4 times daily                                                                 | No                   | No                                      |
| 5            | 51 (8.4%)                  | 0 (0%)        | No                                               | No                                   | NA                      | NA                    | NA                             | NA                                                     | NA                                           | NA                                                                            | No                   | NA                                      |
| 6            | 36 (5.9%)                  | 3 (0.8%)*     | No                                               | Yes                                  | No                      | 60                    | 40                             | No                                                     | No                                           | 3 times daily                                                                 | No                   | NA                                      |
| 7            | 61 (10.0%)                 | 0 (0%)        | No                                               | No                                   | NA                      | NA                    | NA                             | NA                                                     | NA                                           | NA                                                                            | Yes                  | NA                                      |
| 8            | 13 (2.1%)                  | 7 (1.8%)      | Yes                                              | Yes                                  | No                      | 40                    | 40                             | No                                                     | No                                           | First 24 hours HFNO: at 0.5, 1, 2, 4, 6, 12 and 24 hours. Then 4 times daily. | No                   | No                                      |
| 9            | 82 (13.5%)                 | 79 (20.8%)    | Yes                                              | Yes                                  | No                      | 40                    | 40                             | No                                                     | No                                           | 6 times daily                                                                 | No                   | No                                      |
| 10           | 5 (0.8%)                   | 0 (0%)        | No                                               | No                                   | NA                      | NA                    | NA                             | NA                                                     | NA                                           | NA                                                                            | No                   | NA                                      |
| <b>Total</b> | <b>608</b>                 | <b>379</b>    | <b>5/10</b>                                      | <b>7/10</b>                          | <b>1/7</b>              | -                     | -                              | <b>4/7</b>                                             | <b>2/7</b>                                   | -                                                                             | <b>3/7</b>           | <b>0/5</b>                              |

Categorical variables are presented as number with percentage. Abbreviations: DNI: Do not intubate order, HFNO: High-flow nasal oxygen, ICU: Intensive Care unit, L/min: litre per minute, RR: respiratory rate, SpO<sub>2</sub>: oxygen saturation. \*Some patients that started HFNO on the ward, initially had a DNI-order which was lifted later during admission.





Table S3. Overview of staffing on Pulmonary ward/ Intermediate care unit and Intensive Care Units during study period.

| Centre | Pulmonary Intermediate Care Unit<br>nested in regular pulmonary ward |                                                 |                                                               |                                    |                                          | Intensive Care Unit |                                        |                                  |                                    |                                      |                                              |
|--------|----------------------------------------------------------------------|-------------------------------------------------|---------------------------------------------------------------|------------------------------------|------------------------------------------|---------------------|----------------------------------------|----------------------------------|------------------------------------|--------------------------------------|----------------------------------------------|
|        | Mean capacity<br>(HFNO<br>beds)                                      | Day and<br>night-time<br>consultants<br>on call | Day and<br>night-time<br>residents<br>(night-time<br>on call) | Daytime<br>nurse-<br>patient ratio | Night-time<br>nurse-<br>patient<br>ratio | Mean<br>capacity    | Day and night-<br>time<br>intensivists | Day and night-<br>time residents | Day time<br>nurse-patient<br>ratio | Night-time<br>nurse-patient<br>ratio | Non-ICU<br>supportive<br>staff per<br>shift* |
| 1      | 34 (12)                                                              | 1 - 1                                           | 3 - 1                                                         | 1:4                                | 1:4.5                                    | 20                  | 3 - 1.5                                | 2 - 1                            | 1: 2.2                             | 1: 2.2                               | 3                                            |
| 2      | 32 (6)                                                               | 2 - 2                                           | 3 - 2                                                         | 1:3.5                              | 1:4.5                                    | 56                  | 4 - 1                                  | 5 - 3                            | 1: 1.8                             | 1: 2.9                               | 4                                            |
| 3      | 36 (3)                                                               | 1 - 1                                           | 3 - 1                                                         | 1:3.6                              | 1:6                                      | 20                  | 2 - 1                                  | 3 - 2                            | 1: 2.2                             | 1: 2.9                               | 4                                            |
| 4      | 20 (10)                                                              | 2 - 2                                           | 0 - 0                                                         | 1:3                                | 1.6.6                                    | 12                  | 2 - 1                                  | 1 - 1                            | 1: 1.3                             | 1: 2.0                               | 2                                            |
| 5      | NA                                                                   | NA                                              | NA                                                            | NA                                 | NA                                       | 20                  | 2 - 1                                  | 2 - 1                            | 1: 2.5                             | 1: 3.3                               | 5                                            |
| 6      | 20 (2)                                                               | 1 - 1                                           | 2 - 1                                                         | 1:3.3                              | 1:6.6                                    | 13                  | 2 - 1                                  | 3 - 1                            | 1: 1.6                             | 1: 2.6                               | 3                                            |
| 7      | NA                                                                   | NA                                              | NA                                                            | NA                                 | NA                                       | 20                  | 2 - 1                                  | 2 - 1                            | 1: 2.5                             | 1: 3.3                               | 2                                            |
| 8      | 12 (8)                                                               | 1 - 1                                           | 1 - 1                                                         | 1:3                                | 1:6                                      | 8                   | 2 - 1                                  | 1 - 0                            | 1: 1.3                             | 1: 2.0                               | 2                                            |
| 9      | 28 (10)                                                              | 2 - 1                                           | 3 - 1                                                         | 1:3                                | 1:4.6                                    | 16                  | 3 - 1                                  | 3 - 2                            | 1: 1.8                             | 1: 2.3                               | 7                                            |
| 10     | NA                                                                   | NA                                              | NA                                                            | NA                                 | NA                                       | 18                  | 2 - 1                                  | 3 - 2                            | 1: 1.6                             | 1: 1.8                               | 7                                            |

Abbreviations: HFNO: High-flow nasal oxygen, ICU: Intensive Care unit. NA: Not Applicable. In the Netherlands, there are no respiratory therapists in hospital. \*Non-ICU staff included anaesthesia nurses employed for non-ICU nurse tasks during COVID-19 peaks.



Table S4. Detailed overview of standard local medical treatment of patients with COVID-19 treated with HFNO during study period.

| Centre       | Dexamethasone 6mg/day, 10 days | Patients receiving dexamethasone | IL-6 blocking agents <sup>x</sup> , with indications | Patients receiving IL-6 antagonist | Methylprednisolone 1000 mg /day, 3 days | LMWH low dose i.e. dalteparin 1d5000 IU | LMWH intermediate dose i.e. dalteparin 2d 5000 IU | LMWH in therapeutic dose (standard) | Azytromycin, (hydroxy) chloroquin, or any other* | Antibiotics      | Awake proning |
|--------------|--------------------------------|----------------------------------|------------------------------------------------------|------------------------------------|-----------------------------------------|-----------------------------------------|---------------------------------------------------|-------------------------------------|--------------------------------------------------|------------------|---------------|
| 1            | Yes                            | 248/249 (99.6%)                  | Yes, if oxygen $\geq 6L/min$                         | 149/249 <sup>±</sup> (59.8%)       | No                                      | Yes                                     | Yes, ICU only                                     | No                                  | No                                               | No               | No            |
| 2            | Yes                            | 52/53 (98.1%)                    | Yes, if CRP $\geq 75$ and oxygen $\geq 6L/min$       | 46/53 (86.8%)                      | No                                      | Yes                                     | Yes, ICU only                                     | No                                  | No                                               | No               | No            |
| 3            | Yes                            | 43/47 (91.5%)                    | Yes, if oxygen $\geq 6L/min$                         | 30/47 (63.8%)                      | No                                      | No                                      | Yes                                               | No                                  | No                                               | No               | No            |
| 4            | Yes                            | 11/11 (100%)                     | Yes, if CRP $\geq 75$ and any hypoxemia              | 4/11 (36.4%)                       | No                                      | No                                      | Yes                                               | No                                  | No                                               | Yes <sup>†</sup> | No            |
| 5            | Yes                            | 51/51 (100%)                     | Yes, if oxygen $\geq 6L/min$                         | 41/51 (80.4%)                      | No                                      | No                                      | Yes, ICU only                                     | No                                  | No                                               | No               | No            |
| 6            | Yes                            | 36/36 (100%)                     | Yes, at ICU admission                                | 23/36 <sup>±</sup> (63.9%)         | No                                      | Yes                                     | Yes, ICU only                                     | No                                  | No                                               | No               | Yes, ICU only |
| 7            | Yes                            | 61/61 (100%)                     | Yes                                                  | 61/61 (100%)                       | No                                      | Yes                                     | No                                                | Yes, ICU only                       | No                                               | Yes <sup>†</sup> | No            |
| 8            | Yes                            | 12/13 (92.9%)                    | Yes, if CRP $\geq 75$ and oxygen $\geq 6L/min$       | 9/13 (69.2%)                       | No                                      | No                                      | Yes                                               | No                                  | No                                               | Yes <sup>‡</sup> | No            |
| 9            | Yes                            | 82/82 (100%)                     | Yes, if CRP $\geq 75$                                | 22/82 (26.8%)                      | No                                      | Yes                                     | Yes                                               | No                                  | No                                               | No               | No            |
| 10           | Yes                            | 5/5 (100%)                       | Yes, if CRP $\geq 75$ and oxygen $\geq 6L/min$       | 4/5 (80%)                          | No                                      | No                                      | Yes                                               | No                                  | No                                               | No               | No            |
| <b>Total</b> | <b>10/10</b>                   | <b>601/608 (98.8%)</b>           | <b>10/10</b>                                         | <b>389/608 (64.0%)</b>             | <b>0/10</b>                             | <b>5/10</b>                             | <b>9/10</b>                                       | <b>1/10</b>                         | <b>0/10</b>                                      | <b>3/10</b>      | <b>1/10</b>   |

<sup>x</sup>: Tocilizumab 600 mg or sarilumab 400 mg once; was implemented during the study. \*: All hospitals used remdesivir until proven ineffective. <sup>±</sup>: Unknown in N=3 patients. <sup>†</sup>: Ceftriaxone and Ciprofloxacin. <sup>‡</sup>: Ceftriaxone. Abbreviations: CRP: C-reactive protein. IU: International Units. LMWH: Low-Molecular Weight Heparin. IL-6: interleukin-6.



Table S5. Characteristics of the study cohort

|                                                  | Overall<br>(n=608) | Ward-starters<br>(n=379) | ICU-starters<br>(n=229) | P-value | Missing    |
|--------------------------------------------------|--------------------|--------------------------|-------------------------|---------|------------|
| Age                                              | 61 (53 - 68)       | 61 (53 - 68)             | 61 (52 - 67)            | 0.61    | 0          |
| Male sex                                         | 417 (68.6)         | 247 (65.2)               | 170 (74.2)              | 0.03    | 0          |
| Obesity                                          | 252 (41.4)         | 146 (38.5)               | 106 (46.3)              | 0.67    | 53 (8.7)   |
| Number of comorbidities                          |                    |                          |                         | 0.63    | 1 (0.2)    |
| 0                                                | 319 (52.5)         | 213 (56.2)               | 106 (46.3)              |         |            |
| 1                                                | 178 (29.3)         | 105 (27.7)               | 73 (31.9)               |         |            |
| ≥2                                               | 110 (18.1)         | 61 (16.1)                | 49 (21.4)               |         |            |
| SOFA score at hospital admission                 | 3 (2 - 3)          | 2 (2 - 3)                | 3 (3 - 3)               | <0.001  | 36 (5.9)   |
| Non-respiratory SOFA score at hospital admission | 0 (0 - 1)          | 0 (0 - 1)                | 0 (0 - 1)               | 0.12    | 36 (5.9)   |
| 4C mortality score at hospital admission         | 10 (7 - 12)        | 9 (7 - 12)               | 10 (8 - 12)             | 0.02    | 66 (10.9)  |
| 4C deterioration score at hospital admission     | 0.55 (0.43 - 0.65) | 0.52 (0.41 - 0.63)       | 0.59 (0.48 - 0.69)      | <0.001  | 76 (12.5)  |
| Variables at hospital admission                  |                    |                          |                         |         |            |
| S/F ratio                                        | 232 (123 - 288)    | 249 (211 - 291)          | 125 (116 - 238)         | <0.001  | 3 (0.5)    |
| FiO <sub>2</sub>                                 | 0.41 (0.33 - 0.80) | 0.37 (0.33 - 0.45)       | 0.80 (0.41 - 0.80)      | <0.001  | 3 (0.5)    |
| PaO <sub>2</sub> (mmHg)                          | 65.3 (57.0 - 76.8) | 68.0 (59.3 - 77.5)       | 64.0 (55.0 - 73.6)      | 0.001   | 61 (10.0)  |
| P/F ratio                                        | 170 (111 - 243)    | 200 (149 - 262)          | 110 (82.5 - 173)        | <0.001  | 63 (10.4)  |
| Respiratory rate                                 | 25 (22 - 30)       | 25 (20 - 30)             | 28 (23 - 32)            | <0.001  | 5 (0.8)    |
| ROX index                                        | 8.74 (4.95 - 12.7) | 9.76 (7.24 - 13.4)       | 5.23 (3.83 - 10.6)      | <0.001  | 9 (1.5)    |
| Variables prior to HFNO start                    |                    |                          |                         |         |            |
| S/F ratio                                        | 123 (116 - 204)    | 191 (123 - 220)          | 116 (113 - 120)         | <0.001  | 1 (0.2)    |
| FiO <sub>2</sub>                                 | 0.80 (0.45 - 0.80) | 0.60 (0.41 - 0.80)       | 0.80 (0.80 - 0.80)      | <0.001  | 1 (0.2)    |
| Respiratory rate (/min)                          | 28 (24 - 32)       | 26 (24 - 31)             | 30 (25 - 35)            | <0.001  | 8 (1.3)    |
| ROX index                                        | 5.1 (3.9 - 7.5)    | 6.5 (5.0 - 8.5)          | 3.9 (3.4 - 4.7)         | <0.001  | 9 (1.5)    |
| Laboratory values at HFNO start                  |                    |                          |                         |         |            |
| CRP (μmol/L)                                     | 112 (66 - 178)     | 109 (66 - 169)           | 116 (66 - 190)          | 0.296   | 2 (0.3)    |
| Urea (mmol/L)                                    | 6.3 (4.7 - 8.6)    | 6.00 (4.3 - 8.1)         | 6.80 (5.2 - 9.7)        | <0.001  | 6 (1.0)    |
| Ferritin (mg/L)                                  | 1080 (498 - 2070)  | 961 (458 - 2200)         | 1240 (611 - 1930)       | 0.38    | 150 (24.7) |
| Leukocytes (10 <sup>9</sup> /L)                  | 7.6 (5.5 - 10.2)   | 7.1 (5.3 - 9.2)          | 8.4 (6.1 - 11.5)        | <0.001  | 14 (6.5)   |
| Lymphocytes (10 <sup>9</sup> /L)                 | 0.8 (0.6 - 1.1)    | 0.8 (0.6 - 1.1)          | 0.8 (0.6 - 1.2)         | 0.34    | 63 (10.4)  |
| Thrombocytes (10 <sup>9</sup> /L)                | 227 (180 - 290)    | 216 (173 - 264)          | 254 (202 - 314)         | <0.001  | 16 (7.5)   |

| Outcome                                                |                   |                   |                   |        |          |
|--------------------------------------------------------|-------------------|-------------------|-------------------|--------|----------|
| Duration of symptoms at hospital admission (days)      | 8 (7 - 10)        | 8 (7 - 10)        | 9 (7 - 10)        | 0.24   | 27 (4.4) |
| Time between hospital admission and start HFNO (hours) | 17.0 (2.0 - 47.0) | 18.0 (3.0 - 42.7) | 16.0 (2.0 - 59.0) | 0.33   | 4 (0.8)  |
| ICU admission                                          | 415 (68.3)        | 186 (49.1)        | 229 (100)         | <0.001 | 0        |
| Time admitted until ICU admission (hours)              | 35 (5 - 79)       | 47 (24 - 96)      | 12 (2 - 59)       | <0.001 | 23 (3.7) |
| Intubation                                             | 277 (45.6)        | 139 (36.7)        | 138 (60.3)        | <0.001 | 0        |
| Intubation ≤4 hours after HFNO start                   | 28 (4.6)          | 9 (2.4)           | 19 (8.3)          | <0.001 | 2 (0.7)  |
| Intubation ≤6 hours after HFNO start                   | 43 (7.1)          | 14 (3.7)          | 29 (12.7)         | 0.001  | 2 (0.7)  |
| Intubation ≤2 hours after ICU admission                | 43 (7.1)          | 36 (9.5)          | 7 (3.1)           | 0.003  | 2 (0.7)  |
| Intubation ≤4 hours after ICU admission                | 74 (12.2)         | 57 (15.0)         | 17 (7.5)          | 0.01   | 2 (0.7)  |
| Mortality prior to intubation                          | 0                 | 0                 | 0                 | NA     | 0        |
| In-hospital mortality                                  | 56 (9.2)          | 22 (5.8)          | 34 (14.8)         | <0.001 | 0        |
| 28-day mortality after HFNO start                      | 38 (6.3)          | 13 (3.4)          | 25 (10.9)         | <0.001 | 20 (3.3) |
| 90-day mortality after HFNO start                      | 56 (9.2)          | 22 (5.8)          | 34 (14.8)         | <0.001 | 41 (6.7) |
| Hospital-free days at day 28 after admission (days)    | 13 (0 - 19)       | 15 (3 - 19)       | 6 (0 - 17)        | <0.001 | 3 (0.5)  |
| Hospital-free days at day 60 after admission (days)    | 45 (26 - 51)      | 47 (35 - 51)      | 38 (9 - 49)       | <0.001 | 3 (0.5)  |
| ICU-free days at day 28 after HFNO start (days)        | 23 (11 - 28)      | 28 (17 - 28)      | 18 (0 - 23)       | <0.001 | 3 (0.5)  |
| ICU-free days at day 60 after HFNO start (days)        | 55 (43 - 60)      | 60 (49 - 60)      | 50 (30.5 - 55)    | <0.001 | 3 (0.5)  |
| Ventilator-free days at day 28 after HFNO start (days) | 28 (16 - 28)      | 28 (21 - 28)      | 22 (7 - 28)       | <0.001 | 1 (0.2)  |
| Ventilator-free days at day 60 after HFNO start (days) | 60 (48 - 60)      | 60 (53 - 60)      | 54 (36 - 60)      | <0.001 | 1 (0.2)  |

Categorical variables are presented as number with percentage, continuous variables are presented as median with interquartile range. Differences between groups regarding continuous variables were analysed Mann-Whitney U test. Differences between groups regarding categorical variables were analysed using the Chi-squared test, or with Fisher's exact test in case of a cell with less than 5 subjects. Abbreviations: SOFA: Sequential Organ Failure Assessment, HFNO: High-flow Nasal Oxygen, ICU: Intensive Care Unit, S/F ratio: SpO<sub>2</sub>-FiO<sub>2</sub> ratio, P/F ratio: PaO<sub>2</sub>-FiO<sub>2</sub> ratio, CRP: C-reactive Protein



**Table S6. Characteristics of the propensity matched cohort, ward- vs. ICU starters**

|                                              | <b>Ward-starters<br/>(n=107)</b> | <b>ICU- starters<br/>(n=107)</b> | <b>P-value</b> |
|----------------------------------------------|----------------------------------|----------------------------------|----------------|
| Age                                          | 63.0 (54.0 - 70.0)               | 63.0 (53.0 - 69.0)               | 0.62           |
| Male sex                                     | 70 (65.4)                        | 82 (76.6)                        | 0.09           |
| Obesity                                      | 45 (45.9)                        | 45 (42.5)                        | 0.68           |
| Number of comorbidities                      |                                  |                                  | 0.94           |
| 0                                            | 53 (49.5)                        | 49 (46.2)                        |                |
| 1                                            | 30 (28.0)                        | 31 (29.2)                        |                |
| ≥2                                           | 24 (22.4)                        | 26 (24.5)                        |                |
| SOFA score at hospital admission             | 3 (3 - 4)                        | 3 (3 - 4)                        | 0.17           |
| Non-respiratory SOFA at hospital admission   | 0 (0 - 1)                        | 0 (0 - 1)                        | 0.04           |
| 4C mortality score at hospital admission     | 11 (8- 13)                       | 10 (8 - 12)                      | 0.61           |
| 4C deterioration score at hospital admission | 0.58 (0.45 - 0.67)               | 0.58 (0.47 - 0.67)               | 0.88           |
| <b>Variables at hospital admission</b>       |                                  |                                  |                |
| S/F ratio                                    | 204 (120 - 283)                  | 160 (119 - 236)                  | 0.35           |
| FiO <sub>2</sub>                             | 0.45 (0.33 - 0.80)               | 0.60 (0.41 - 0.80)               | 0.36           |
| PaO <sub>2</sub> (mmHg)                      | 73.0 (59.8 - 88.5)               | 65.0 (56.1 - 77.0)               | 0.12           |
| P/F ratio                                    | 153 (112 - 226)                  | 123 (89 - 200)                   | 0.08           |
| Respiratory rate (/min)                      | 26.5 (22 - 32)                   | 26 (22 - 30)                     | 0.44           |
| ROX index                                    | 7.1 (4.6 - 12.7)                 | 6.0 (4.1 - 11.8)                 | 0.95           |
| <b>Variables prior to HFNO start</b>         |                                  |                                  |                |
| S/F ratio                                    | 119 (115 - 121)                  | 118 (114 - 121)                  | 0.93           |
| FiO <sub>2</sub>                             | 0.80 (0.80 - 0.80)               | 0.80 (0.80 - 0.80)               | 0.97           |
| Respiratory rate (/min)                      | 28 (24 - 32)                     | 28 (24 - 32)                     | 0.88           |
| ROX index                                    | 4.3 (3.7 - 5.1)                  | 4.2 (3.8 - 5.0)                  | 0.70           |
| <b>Laboratory at HFNO start</b>              |                                  |                                  |                |
| CRP (μmol/L)                                 | 112 (49.8 - 188)                 | 98.0 (54.5 - 168)                | 0.66           |
| Urea (mmol/L)                                | 6.8 (4.9 - 8.2)                  | 7.4 (5.9 - 9.7)                  | <0.01          |
| Ferritin (mg/L)                              | 1013 (414 - 2190)                | 1411 (645 - 2020)                | 0.77           |
| Leukocytes (10 <sup>9</sup> /L)              | 7.1 (5.7 - 9.2)                  | 8.0 (5.6 - 10.8)                 | 0.06           |
| Lymphocytes (10 <sup>9</sup> /L)             | 0.7 (0.6 - 0.9)                  | 0.8 (0.6 - 1.2)                  | 0.24           |
| Thrombocytes (10 <sup>9</sup> /L)            | 220 (174 - 290)                  | 226 (187 - 286)                  | 0.95           |



| Outcome                                                |                   |                   |        |
|--------------------------------------------------------|-------------------|-------------------|--------|
| Duration of symptoms at hospital admission (days)      | 8.0 (6.3 - 10.0)  | 9.0 (7.0 - 10.0)  | 0.25   |
| Time between hospital admission and start HFNO (hours) | 5.0 (2.0 - 59.0)  | 16.0 (2.0 - 67.0) | 0.69   |
| ICU admission                                          | 68 (63.6)         | 107 (100)         | NA     |
| Time on HFNO until ICU admission (hours)               | 16.0 (4.0 - 43.0) | -                 | NA     |
| Intubation                                             | 57 (53.3)         | 64 (59.8)         | 0.42   |
| Intubation ≤4 hours after HFNO start                   | 7 (6.5)           | 7 (6.5)           | 1      |
| Intubation ≤6 hours after HFNO start                   | 11 (10.3)         | 13 (12.1)         | 0.83   |
| Intubation ≤2 hours after ICU admission                | 16 (15.0)         | 1 (0.9)           | 0.001  |
| Intubation ≤4 hours after ICU admission                | 25 (23.4)         | 7 (6.5)           | <0.01  |
| Time on HFNO until intubation (hours)                  | 37.2 (9.3 - 85.5) | 23.7 (9.0 - 52.6) | 0.17   |
| Time between ICU admission and intubation (hours)      | 5.3 (1.5 - 23.0)  | 23.5 (9.8 - 51.3) | 0.01   |
| Mortality prior to intubation                          | 0                 | 0                 | NA     |
| Prone positioning after intubation                     | 47 (43.9)         | 51 (47.6)         | 0.50   |
| In hospital mortality                                  | 14 (13.1)         | 19 (17.8)         | 0.45   |
| 28-day mortality after HFNO start                      | 8 (7.5)           | 13 (13.0)         | 0.24   |
| 90-day mortality after HFNO start                      | 13 (12.6)         | 19 (19.8)         | 0.33   |
| Hospital-free days at day 28 after admission (days)    | 9 (0 - 16)        | 4 (0 - 17)        | 0.62   |
| Hospital-free days at day 60 after admission (days)    | 41 (19 - 48)      | 36 (0 - 49)       | 0.29   |
| ICU-free days at day 28 after HFNO start (days)        | 21 (10 - 28)      | 17 (0 - 24)       | <0.001 |
| ICU-free days at day 60 after HFNO start (days)        | 53 (42 - 60)      | 49 (5.5 - 56)     | 0.02   |
| Ventilator-free days at day 28 after HFNO start (days) | 24 (13 - 28)      | 22 (1.5 - 28)     | 0.13   |
| Ventilator-free days at day 60 after HFNO start (days) | 56 (45 - 60)      | 54 (13.5 - 60)    | 0.13   |

Categorical variables are presented as number with percentage, continuous variables are presented as median with Interquartile range. Differences between groups regarding continuous variables were analysed by Wilcoxon signed rank. Differences between groups regarding categorical variables were analysed using a McNemar test. Abbreviations: SOFA: Sequential Organ Failure Assessment, HFNO: High-flow Nasal Oxygen, ICU: Intensive Care Unit, S/F ratio: SpO<sub>2</sub>-FiO<sub>2</sub> ratio, P/F ratio: PaO<sub>2</sub>-FiO<sub>2</sub> ratio, CRP: C-reactive Protein



**Table S7. Distribution of centers within the matched cohort, compared between ward- and ICU-starters.**

| <b>Institute</b> | <b>ward<br/>(n=107)</b> | <b>ICU<br/>(n=107)</b> |
|------------------|-------------------------|------------------------|
| 1                | 44 (41.1)               | 10 (9.3)               |
| 2                | 37 (34.6)               | 5 (4.7)                |
| 3                | 4 (3.7)                 | 19 (17.8)              |
| 4                | 3 (2.8)                 | 0 (0.0)                |
| 5                | 0 (0.0)                 | 20 (18.7)              |
| 6                | 3 (2.8)                 | 16 (15.0)              |
| 7                | 0 (0.0)                 | 32 (29.9)              |
| 8                | 4 (3.7)                 | 1 (0.9)                |
| 9                | 12 (1.2)                | 2 (1.9)                |
| 10               | 0 (0.0)                 | 2 (1.9)                |

Numbers of patients with percentages between brackets.



Table S8. Characteristics of ICU-starters, non-matched vs. propensity matched

|                                                        | Non-matched<br>(n=122) | Matched<br>(n=107) | P-value |
|--------------------------------------------------------|------------------------|--------------------|---------|
| Age                                                    | 60 (52 - 65)           | 63 (53 - 69)       | 0.14    |
| Male sex                                               | 88 (72.1)              | 82 (76.6)          | 0.53    |
| Obesity                                                | 61 (50.4)              | 45 (42.5)          | 0.29    |
| Number of comorbidities                                |                        |                    | 0.52    |
| 0                                                      | 57 (46.7)              | 49 (46.2)          |         |
| 1                                                      | 42 (34.4)              | 31 (29.2)          |         |
| ≥2                                                     | 23 (18.9)              | 26 (24.5)          |         |
| SOFA score at hospital admission                       | 3 (2 - 3)              | 3 (3 - 3.8)        | 0.37    |
| Non-respiratory SOFA score at hospital admission       | 0 (0 - 1)              | 0 (0 - 1)          | 0.14    |
| 4C mortality score at hospital admission               | 10 (8 - 12)            | 10 (8 - 12)        | 0.35    |
| 4C deterioration score at hospital admission           | 0.60 (0.49 - 0.72)     | 0.58 (0.47 - 0.67) | 0.11    |
| Variables at hospital admission                        |                        |                    |         |
| S/F ratio                                              | 121 (116 - 239)        | 160 (119 - 236)    | 0.04    |
| FiO <sub>2</sub>                                       | 0.80 (0.40 - 0.80)     | 0.60 (0.41 - 0.80) | 0.12    |
| PaO <sub>2</sub> (mmHg)                                | 62 (55 - 71)           | 65 (56 - 77)       | 0.08    |
| P/F ratio                                              | 101 (78 - 167)         | 123 (89 - 200)     | 0.02    |
| Respiratory rate (/min)                                | 30 (24 - 34)           | 26 (22 - 30)       | 0.02    |
| ROX index                                              | 4.7 (3.6 - 10.2)       | 6.0 (4.1 - 11.5)   | 0.02    |
| Variables prior to HFNO start                          |                        |                    |         |
| S/F ratio                                              | 115 (111 - 119)        | 118 (114 - 121)    | 0.001   |
| FiO <sub>2</sub>                                       | 0.80 (0.80 - 0.80)     | 0.80 (0.80 - 0.80) | <0.001  |
| Respiratory rate (/min)                                | 31 (26 - 38)           | 28 (24 - 32)       | <0.001  |
| ROX index                                              | 3.7 (3.1 - 4.2)        | 4.2 (3.8 - 5.0)    | <0.001  |
| Outcome                                                |                        |                    |         |
| Duration of symptoms at hospital admission (days)      | 8 (7 - 11)             | 9 (7 - 10)         | 0.70    |
| Time between hospital admission and start HFNO (hours) | 10.0 (1.0 - 51.8)      | 16.0 (2.0 - 67.0)  | 0.26    |
| Intubation                                             | 74 (60.7)              | 64 (59.8)          | 0.99    |
| Intubation ≤4 hours after HFNO start                   | 12 (9.8)               | 7 (6.5)            | 0.51    |
| Intubation ≤6 hours after HFNO start                   | 16 (13.1)              | 13 (12.1)          | 0.98    |
| Intubation ≤2 hours after ICU admission                | 6 (5.0)                | 1 (0.9)            | 0.17    |

|                                                        |                |                |      |
|--------------------------------------------------------|----------------|----------------|------|
| Intubation ≤4 hours after ICU admission                | 10 (8.3)       | 7 (6.6)        | 0.83 |
| In-hospital mortality                                  | 16 (13.1)      | 19 (17.8)      | 0.43 |
| 28-day mortality after HFNO start                      | 12 (9.8)       | 13 (13.0)      | 0.75 |
| 90-day mortality after HFNO start                      | 15 (12.3)      | 19 (17.8)      | 0.41 |
| Hospital-free days at day 28 after admission (days)    | 7 (0 - 16)     | 4 (0 - 17)     | 0.61 |
| Hospital-free days at day 60 after admission (days)    | 39 (19 - 48)   | 36 (0 - 49)    | 0.55 |
| ICU-free days at day 28 after HFNO start (days)        | 19 (2.8 - 23)  | 17 (0 - 24)    | 0.61 |
| ICU-free days at day 60 after HFNO start (days)        | 51 (34.5)      | 49 (5.5 - 56)  | 0.49 |
| Ventilator-free days at day 28 after HFNO start (days) | 23 (10.8 - 28) | 22 (1.5 - 28)  | 0.30 |
| Ventilator-free days at day 60 after HFNO start (days) | 55 (42 - 60)   | 54 (13.5 - 60) | 0.26 |

Categorical variables are presented as number with percentage, continuous variables are presented as median with Interquartile range. Differences between groups regarding continuous variables were analysed with the Mann–Whitney U test. Differences between groups regarding categorical variables were analysed using the Chi-squared test, or with Fisher’s exact test in case of a cell with less than 5 subjects. Abbreviations: SOFA: Sequential Organ Failure Assessment, HFNO: High-flow Nasal Oxygen, ICU: Intensive Care Unit, S/F ratio: SpO<sub>2</sub>-FiO<sub>2</sub> ratio, CRP: C-reactive Protein



Table S9. Characteristics of ward-starters, non-matched vs. propensity matched

|                                                        | Non-matched<br>(n=272) | Matched<br>(n=107) | P-value |
|--------------------------------------------------------|------------------------|--------------------|---------|
| Age                                                    | 60 (53 - 68)           | 63 (54 - 70)       | 0.19    |
| Male sex                                               | 177 (65.1)             | 70 (65.4)          | 0.99    |
| Obesity                                                | 101 (43.9)             | 45 (45.9)          | 0.83    |
| Number of comorbidities                                |                        |                    | 0.09    |
| 0                                                      | 160 (58.8)             | 53 (49.5)          |         |
| 1                                                      | 75 (27.6)              | 30 (28.0)          |         |
| ≥2                                                     | 37 (13.6)              | 24 (22.4)          |         |
| SOFA score at hospital admission                       | 2 (2 - 3)              | 3 (3 - 4)          | <0.001  |
| Non-respiratory SOFA score at hospital admission       | 0 (0 - 1)              | 0 (0 - 1)          | 0.12    |
| 4C mortality score at hospital admission               | 9 (7 - 11)             | 11 (8 - 13)        | <0.01   |
| 4C deterioration score at hospital admission           | 0.50 (0.40 - 0.61)     | 0.58 (0.45 - 0.67) | 0.001   |
| Variables at hospital admission                        |                        |                    |         |
| S/F ratio                                              | 256 (229 - 300)        | 204 (120 - 283)    | <0.001  |
| FiO <sub>2</sub>                                       | 0.37 (0.33 - 0.41)     | 0.45 (0.33 - 0.80) | <0.001  |
| PaO <sub>2</sub> (mmHg)                                | 66 (59 - 75)           | 73 (60 - 88.50)    | 0.04    |
| P/F ratio                                              | 211 (162 - 272)        | 153 (112 - 226)    | <0.001  |
| Respiratory rate (/min)                                | 24 (20 - 30)           | 26.50 (22 - 32)    | 0.01    |
| ROX index                                              | 10.4 (8.4 - 14.1)      | 7.1 (4.6 - 12.7)   | <0.001  |
| Variables prior to HFNO start                          |                        |                    |         |
| S/F ratio                                              | 207 (160 - 227)        | 119 (115 - 121)    | <0.001  |
| FiO <sub>2</sub>                                       | 0.45 (0.41 - 0.60)     | 0.80 (0.80 - 0.80) | <0.001  |
| Respiratory rate (/min)                                | 26 (24 - 30)           | 28 (24 - 32)       | 0.06    |
| ROX index                                              | 7.6 (6.1 - 9.3)        | 4.3 (3.7 - 5.1)    | <0.001  |
| Outcome                                                |                        |                    |         |
| Duration of symptoms at hospital admission (days)      | 8 (7 - 11)             | 8 (6.3 - 10)       | 0.74    |
| Time between hospital admission and start HFNO (hours) | 8.0 (7.0 - 11.0)       | 5.0 (2.0 - 56.8)   | 0.21    |
| Intubation                                             | 82 (30.1)              | 57 (53.3)          | <0.001  |
| Intubation ≤4 hours after HFNO start                   | 2 (0.7)                | 7 (6.5)            | <0.01   |
| Intubation ≤6 hours after HFNO start                   | 3 (1.1)                | 11 (10.3)          | <0.001  |
| Intubation ≤2 hours after ICU admission                | 20 (7.4)               | 15 (14.0)          | 0.07    |
| Intubation ≤4 hours after ICU admission                | 32 (11.8)              | 24 (22.4)          | 0.01    |
| In-hospital mortality                                  | 9 (3.3)                | 14 (13.1)          | 0.001   |



|                                                        |              |              |        |
|--------------------------------------------------------|--------------|--------------|--------|
| 28-day mortality after HFNO start                      | 5 (1.8)      | 8 (7.5)      | 0.02   |
| 90-day mortality after HFNO start                      | 10 (3.7)     | 13 (12.6)    | <0.01  |
| Hospital-free days at day 28 after admission (days)    | 16 (9 - 20)  | 9 (0 - 16)   | <0.001 |
| Hospital-free days at day 60 after admission (days)    | 48 (41 - 52) | 41 (19 - 48) | <0.001 |
| ICU-free days at day 28 after HFNO start (days)        | 28 (21 - 28) | 21 (10 - 28) | <0.001 |
| ICU-free days at day 60 after HFNO start (days)        | 60 (53 - 60) | 53 (42 - 60) | <0.001 |
| Ventilator-free days at day 28 after HFNO start (days) | 28 (24 - 28) | 24 (13 - 28) | <0.001 |
| Ventilator-free days at day 60 after HFNO start (days) | 60 (56 - 60) | 56 (45 - 60) | <0.001 |

---

Categorical variables are presented as number with percentage, continuous variables are presented as median with Interquartile range. Differences between groups regarding continuous variables were analysed with the Mann–Whitney U test. Differences between groups regarding categorical variables were analysed using the Chi-squared test, or with Fisher’s exact test in case of a cell with less than 5 subjects. Abbreviations: SOFA: Sequential Organ Failure Assessment, HFNO: High-flow Nasal Oxygen, ICU: Intensive Care Unit, S/F ratio: SpO<sub>2</sub>-FiO<sub>2</sub> ratio, CRP: C-reactive Protein



Table S10. Intubated patients, ward- vs. ICU-starters.

|                                                  | Ward-starters<br>(n=139) | ICU-starters<br>(n=138) | P-value |
|--------------------------------------------------|--------------------------|-------------------------|---------|
| Age                                              | 63 (54.5 - 70)           | 62 (54 - 70)            | 0.81    |
| Male sex                                         | 93 (66.9)                | 104 (75.4)              | 0.16    |
| Obesity                                          | 60 (43.2)                | 68 (49.3)               | 0.40    |
| Number of comorbidities                          |                          |                         | 0.64    |
| 0                                                | 69 (49.6)                | 63 (45.7)               |         |
| 1                                                | 39 (28.1)                | 46 (33.3)               |         |
| ≥2                                               | 31 (22.3)                | 29 (21.0)               |         |
| SOFA score at hospital admission                 | 3 (2 - 4)                | 3 (3 - 3)               | 0.96    |
| Non-respiratory SOFA score at hospital admission | 1 (0 - 1)                | 0 (0 - 1)               | <0.001  |
| 4C mortality score at hospital admission         | 11 (8 - 13)              | 11 (8 - 13)             | 0.56    |
| 4C deterioration score at hospital admission     | 0.58 (0.44 - 0.67)       | 0.61 (0.48 - 0.71)      | 0.05    |
| Variables at hospital admission                  |                          |                         |         |
| S/F ratio                                        | 232 (157 - 288)          | 153 (116 - 244)         | <0.001  |
| FiO <sub>2</sub>                                 | 0.41 (0.33 - 0.60)       | 0.60 (0.38 - 0.80)      | <0.001  |
| PaO <sub>2</sub> (mmHg)                          | 69 (62 - 82)             | 63 (55 - 72)            | <0.001  |
| P/F ratio                                        | 197 (138 - 262)          | 110 (81 - 176)          | <0.001  |
| Respiratory rate (/min)                          | 25 (22 - 30)             | 27 (22 - 32)            | 0.26    |
| ROX index                                        | 8.7 (5.7 - 12.7)         | 5.5 (3.8 - 11.2)        | <0.001  |
| Variables prior to HFNO start                    |                          |                         |         |
| S/F ratio                                        | 155 (118 - 206)          | 115 (111 - 119)         | <0.001  |
| FiO <sub>2</sub>                                 | 0.60 (0.45 - 0.80)       | 0.80 (0.80 - 0.80)      | <0.001  |
| Respiratory rate (/min)                          | 28 (24 - 32)             | 30 (25 - 35)            | <0.01   |
| ROX index                                        | 5.3 (4.3 - 7.3)          | 3.8 (3.3 - 4.6)         | <0.001  |
| Laboratory at HFNO start                         |                          |                         |         |
| CRP (μmol/L)                                     | 109 (67.3 - 156)         | 118 (71.0 - 197)        | 0.18    |
| Urea (mmol/L)                                    | 7.1 (4.9 - 8.8)          | 6.9 (5.2 - 10.1)        | 0.26    |
| Ferritin (mg/L)                                  | 1060 (463 - 2420)        | 1240 (618 - 1910)       | 0.90    |
| Leukocytes (10 <sup>9</sup> /L)                  | 6.2 (4.5 - 8.3)          | 8.2 (6.0 - 11.1)        | <0.001  |
| Lymphocytes (10 <sup>9</sup> /L)                 | 0.80 (0.60 - 1.0)        | 0.80 (0.55 - 1.1)       | 0.95    |
| Thrombocytes (10 <sup>9</sup> /L)                | 195 (157 - 233)          | 250 (196 - 310)         | <0.001  |

|                                                        |                     |                     |        |
|--------------------------------------------------------|---------------------|---------------------|--------|
| Variables on HFNO prior to intubation                  |                     |                     |        |
| S/F ratio                                              | 95.0 (91.0 - 104.4) | 93.4 (89.8 - 100.3) | 0.03   |
| P/F ratio                                              | 65 (58 - 75)        | 64 (56 - 73)        | 0.52   |
| PaCO <sub>2</sub> (mmHg)                               | 33.8 (31.0 - 37.0)  | 35.0 (33.0 - 39.0)  | <0.001 |
| Respiratory rate (/min)                                | 30 (26 - 35)        | 30 (24 - 35)        | 0.26   |
| ROX index                                              | 3.20 (2.76 - 3.76)  | 3.38 (2.72 - 4.0)   | 0.41   |
| Outcome                                                |                     |                     |        |
| ICU admission                                          | 139 (100)           | 138 (100)           | NA     |
| Time on HFNO until ICU admission (hours)               | 18.5 (5 - 41)       | -                   | NA     |
| Intubation ≤4 hours after HFNO start                   | 19 (13.8)           | 9 (6.5)             | 0.07   |
| Intubation ≤6 hours after HFNO start                   | 29 (21.0)           | 14 (10.1)           | 0.02   |
| Intubation ≤2 hours after ICU admission                | 7 (5.1)             | 35 (25.2)           | <0.001 |
| Intubation ≤4 hours after ICU admission                | 17 (12.5)           | 56 (40.3)           | <0.001 |
| Time on HFNO until intubation (hours)                  | 37 (14 - 74)        | 23 (9 - 51)         | 0.01   |
| Time between ICU admission and intubation (hours)      | 6 (2 - 22)          | 23 (9 - 51)         | <0.001 |
| Mortality prior to intubation                          | 0                   | 0                   | NA     |
| Prone positioning after intubation                     | 112 (80.6)          | 104 (78.2)          | 0.74   |
| In hospital mortality                                  | 23 (16.5)           | 33 (24.6)           | 0.13   |
| 28-day mortality after HFNO start                      | 13 (9.4)            | 24 (17.4)           | 0.06   |
| 90-day mortality after HFNO start                      | 22 (15.8)           | 33 (23.9)           | 0.09   |
| Hospital-free days at day 28 after admission (days)    | 0 (0 - 9)           | 0 (0 - 8)           | 0.92   |
| Hospital-free days at day 60 after admission (days)    | 25 (0 - 41)         | 23.5 (0 - 40)       | 0.37   |
| ICU-free days at day 28 after HFNO start (days)        | 10 (1 - 19)         | 6 (0 - 18)          | 0.04   |
| ICU-free days at day 60 after HFNO start (days)        | 42 (14 - 51)        | 38 (0 - 50)         | 0.13   |
| Ventilator-free days at day 28 after HFNO start (days) | 15 (1 - 22)         | 12.5 (0 - 21)       | 0.19   |
| Ventilator-free days at day 60 after HFNO start (days) | 47 (15.5 - 54)      | 42 (0 - 53)         | 0.16   |

Categorical variables are presented as number with percentage, continuous variables are presented as median with Interquartile range. Differences between groups regarding continuous variables were analysed Mann–Whitney U test. Differences between groups regarding categorical variables were analysed using the Chi-squared test, or with Fisher’s exact test in case of a cell with less than 5 subjects. Abbreviations: SOFA: Sequential Organ Failure Assessment, HFNO: High-flow Nasal Oxygen, ICU: Intensive Care Unit, S/F ratio: SpO<sub>2</sub>-FiO<sub>2</sub> ratio, P/F ratio: PaO<sub>2</sub>-FiO<sub>2</sub> ratio, CRP: C-reactive Protein

**Table S11. Predictors for ICU admission among patients starting HFNO outside ICU**

| Variable                                  | Odds Ratio | 95% Confidence Interval | P-value |
|-------------------------------------------|------------|-------------------------|---------|
| Age                                       | 1.01       | 0.98 - 1.04             | 0.60    |
| Male sex                                  | 1.83       | 0.95 - 3.60             | 0.07    |
| Body Mass Index (kg/m <sup>2</sup> )      | 1.00       | 0.95 - 1.06             | 0.87    |
| Number of comorbidities                   |            |                         |         |
| 0                                         | Reference  |                         |         |
| 1                                         | 0.88       | 0.43 - 1.78             | 0.72    |
| ≥2                                        | 0.90       | 0.36 - 2.20             | 0.81    |
| Variables prior to HFNO start             |            |                         |         |
| Respiratory rate (/min)                   | 1.09       | 1.04 - 1.15             | 0.001   |
| Supplemental oxygen                       |            |                         |         |
| Supplemental oxygen group 1               | Reference  |                         |         |
| Supplemental oxygen group 2               | 3.35       | 1.58 - 7.31             | 0.002   |
| Supplemental oxygen group 3               | 3.57       | 1.71 - 7.68             | <0.001  |
| SpO <sub>2</sub> prior to start HFNO      | 0.87       | 0.78 - 0.96             | 0.01    |
| Laboratory at HFNO start                  |            |                         |         |
| CRP (μmol/L)                              | 1.00       | 1.00 - 1.00             | 0.94    |
| Urea (mmol/L)                             | 1.06       | 0.98 - 1.16             | 0.17    |
| Leukocytes (10 <sup>9</sup> /L)           | 0.94       | 0.87 - 1.00             | 0.07    |
| Lymphocytes (10 <sup>9</sup> /L)          | 1.03       | 0.85 - 1.29             | 0.79    |
| Thrombocytes (10 <sup>9</sup> /L)         | 1.00       | 0.99 - 1.00             | 0.12    |
| Duration of symptoms at HFNO start (days) | 0.88       | 0.79 - 0.97             | 0.01    |

Supplemental oxygen prior to HFNO start was divided into three categories: Group 1: nasal cannula 1-6 L/min or air-entrainment mask 10L/min, Group 2: air-entrainment mask 15L/min or non-rebreathing mask 10 L/min, Group 3: non-rebreathing mask 15L/min. Association between variables and ICU-admission were assessed in a multivariable logistic regression model on all patients who started HFNO outside ICU (n=379, n=186 admitted to ICU).

Abbreviations: HFNO: High-flow Nasal Oxygen, ICU: Intensive Care Unit, SpO<sub>2</sub>: oxygen saturation by pulse-oximetry, CRP: C-reactive Protein

## References

1. Gupta RK, Harrison EM, Ho A, Docherty AB, Knight SR, van Smeden M, et al. Development and validation of the ISARIC 4C Deterioration model for adults hospitalised with COVID-19: a prospective cohort study. *Lancet Respir Med*. 2021;9(4):349-59.
2. Grasselli G, Zangrillo A, Zanella A, Antonelli M, Cabrini L, Castelli A, et al. Baseline Characteristics and Outcomes of 1591 Patients Infected With SARS-CoV-2 Admitted to ICUs of the Lombardy Region, Italy. *JAMA*. 2020;323(16):1574-81.
3. Zhou F, Yu T, Du R, Fan G, Liu Y, Liu Z, et al. Clinical course and risk factors for mortality of adult inpatients with COVID-19 in Wuhan, China: a retrospective cohort study. *Lancet*. 2020;395(10229):1054-62.
4. Gao M, Piernas C, Astbury NM, Hippisley-Cox J, O'Rahilly S, Aveyard P, et al. Associations between body-mass index and COVID-19 severity in 6.9 million people in England: a prospective, community-based, cohort study. *Lancet Diabetes Endocrinol*. 2021;9(6):350-9.
5. Williamson EJ, Walker AJ, Bhaskaran K, Bacon S, Bates C, Morton CE, et al. Factors associated with COVID-19-related death using OpenSAFELY. *Nature*. 2020;584(7821):430-6.
6. Richardson S, Hirsch JS, Narasimhan M, Crawford JM, McGinn T, Davidson KW, et al. Presenting Characteristics, Comorbidities, and Outcomes Among 5700 Patients Hospitalized With COVID-19 in the New York City Area. *JAMA*. 2020;323(20):2052-9.
7. Mei Y, Weinberg SE, Zhao L, Frink A, Qi C, Behdad A, et al. Risk stratification of hospitalized COVID-19 patients through comparative studies of laboratory results with influenza. *EClinicalMedicine*. 2020;26:100475.
8. Huang C, Wang Y, Li X, Ren L, Zhao J, Hu Y, et al. Clinical features of patients infected with 2019 novel coronavirus in Wuhan, China. *Lancet*. 2020;395(10223):497-506.
9. Reyes LF, Murthy S, Garcia-Gallo E, Merson L, Ibanez-Prada ED, Rello J, et al. Respiratory support in patients with severe COVID-19 in the International Severe Acute Respiratory and Emerging Infection (ISARIC) COVID-19 study: a prospective, multinational, observational study. *Critical Care (London, England)*. 2022;26(1):276.
10. Gandhi RT, Lynch JB, Del Rio C. Mild or Moderate Covid-19. *N Engl J Med*. 2020;383(18):1757-66.
11. Liu L, Xie J, Wu W, Chen H, Li S, He H, et al. A simple nomogram for predicting failure of non-invasive respiratory strategies in adults with COVID-19: a retrospective multicentre study. *Lancet Digit Health*. 2021;3(3):e166-e74.
12. Xia J, Zhang Y, Ni L, Chen L, Zhou C, Gao C, et al. High-Flow Nasal Oxygen in Coronavirus Disease 2019 Patients With Acute Hypoxemic Respiratory Failure: A Multicenter, Retrospective Cohort Study. *Crit Care Med*. 2020;48(11):e1079-e86.
13. Mellado-Artigas R, Mujica LE, Ruiz ML, Ferreyro BL, Angriman F, Arruti E, et al. Predictors of failure with high-flow nasal oxygen therapy in COVID-19 patients with acute respiratory failure: a multicenter observational study. *J Intensive Care*. 2021;9(1):23.
